# Supplementary material for: Yeast Models of Amyotrophic Lateral Sclerosis Type 8 Mimic Phenotypes Seen in Mammalian Cells Expressing Mutant VAPBP56S
Source: MDPI journal article supplement (doi:10.3390/biom13071147), 2023-07-19
Supplement: s1 [file s1]

## Supplementary File 1: Coding sequences of yeast *SCS2* and human *VAPB* used in this study

1-1: *SCS2*<sup>WT</sup>

1-2: *scs2*<sup>P51S, P58S</sup>

1-3: *VAPB*<sup>WT</sup>

1-4: *VAPB*<sup>P56S</sup>

For mutant alleles, nucleotide substitutions are noted in lowercase. Underlined sequences correspond to missense mutations resulting in *scs2*<sup>P51S, P58S</sup> and *VAPB*<sup>P56S</sup> alleles. Red text in the *scs2*<sup>P51S, P58S</sup> coding sequence indicate PvuI and NheI sites that were intentionally introduced with silent mutations to facilitate detection of the mutant allele in future applications.

**1-1:** *SCS2 (WT)*

ATGTCTGCTGTTGAAATTTCCCCTGACGTGTTGGTGTATAAGTCTCCATTAACGGAGCAATCGACAGAATACGCTAG  
TATTTCCAACAATTGACACCAAACCATTGCATTTAAGGTCAAGACCACAGCCCCAAAGTTTTACTGCGTGAGACCAA  
ACGCCGCAGTTGTTGCTCCAGGTGAAACAATCCAGGTTCAAGTTATCTTCCTGGGTTTGACTGAAGAGCCTGCCGCA  
GACTTTAAGTGCCGTGACAAGTTCCTGGTTATCACGTTGCCTTCTCCTTACGACCTCAATGGCAAGGCTGTTGCAGA  
TGTTTGGTCCGACTTGGAGGCTGAGTTCAAGCAACAGGCTATCTCTAAAAAGATAAAAGTCAAATATTTGATAAGTC  
CAGATGTACACCCAGCACAGAACCAAAATATACAGGAAAACAAGGAACTGTTGAACCAAGTAGTCCAAGACAGTGAG  
CCAAAGGAAGTGCCTGCTGTGGTAAACGAAAAGGAGGTCCTGCTGAACCGGAACTCAACCTCCCGTCCAAGTAAA  
GAAAGAAGAGGTCCACCTGTCGTTTCAGAAAACCGTTTCCTCATGAAAATGAGAAGCAAACGTCCAACAGCACTCCGG  
CCCCACAGAACCAGATAAAGGAAGCCGCAACCGTACCTGCAGAAAATGAATCATCCAGCATGGGTATATTCATATTG  
GTTGCACTCCTTATCTTGGTTTTAGGATGGTTCTACAGATAA

**1-2:** *scs2 (P51S, P58S)*

ATGTCTGCTGTTGAAATTTCCCCTGACGTGTTGGTGTATAAGTCTCCATTAACGGAGCAATCGACAGAATACGCTAG  
TATTTCCAACAATTGACACCAAACCATTGCATTTAAGGTCAAGACCACAGCCCCAAAGTTTTACTGCGTGcGAtCgA  
ACGCCGCAGTTGTTGCTagcGGTGAACAATCCAGGTTCAAGTTATCTTCCTGGGTTTGACTGAAGAGCCTGCCGCA  
GACTTTAAGTGCCGTGACAAGTTCCTGGTTATCACGTTGCCTTCTCCTTACGACCTCAATGGCAAGGCTGTTGCAGA  
TGTTTGGTCCGACTTGGAGGCTGAGTTCAAGCAACAGGCTATCTCTAAAAAGATAAAAGTCAAATATTTGATAAGTC  
CAGATGTACACCCAGCACAGAACCAAAATATACAGGAAAACAAGGAACTGTTGAACCAAGTAGTCCAAGACAGTGAG  
CCAAAGGAAGTGCCTGCTGTGGTAAACGAAAAGGAGGTCCTGCTGAACCGGAACTCAACCTCCCGTCCAAGTAAA  
GAAAGAAGAGGTCCACCTGTCGTTTCAGAAAACCGTTTCCTCATGAAAATGAGAAGCAAACGTCCAACAGCACTCCGG  
CCCCACAGAACCAGATAAAGGAAGCCGCAACCGTACCTGCAGAAAATGAATCATCCAGCATGGGTATATTCATATTG  
GTTGCACTCCTTATCTTGGTTTTAGGATGGTTCTACAGATAA

**1-3:** *VAPB (WT)*

ATGGCGAAGGTGGAGCAGGTCTGAGCCTCGAGCCGCAGCACGAGCTCAAATTCGAGGTCCCTTCACCGATGTTGT  
CACCACCAACCTAAAGCTTGGCAACCCGACAGACCGAAATGTGTGTTTTAAGGTGAAGACTACAGCACCACGTAGGT  
ACTGTGTGAGGCCCAACAGCGGAATCATCGATGCAGGGGCCTCAATTAATGTATCTGTGATGTTACAGCCTTTTCGAT  
TATGATCCCAATGAGAAAAGTAAACACAAGTTTATGGTTTCAGTCTATGTTTGCTCCAAGTACACTTCAGATATGGA  
AGCAGTATGGAAGGAGGCAAAACCGGAAGACCTTATGGATTCAAAACTTAGATGTGTGTTTGAATTGCCAGCAGAGA  
ATGATAAACCACATGATGTAGAAATAAATAAAATTATATCCACAAGTGCATCAAAGACAGAAACACCAATAGTGTCT  
AAGTCTCTGAGTTCTTCTTTGGATGACACCGAAGTTAAGAAGGTTATGGAAGAATGTAAGAGGCTGCAAGGTGAAGT  
TCAGAGGCTACGGGAGGAGAACAAGCAGTTCAAGGAAGAAGATGGACTGCGGATGAGGAAGACAGTGCAGAGCAACA  
GCCCCATTTTCAGCATTAGCCCCAACTGGGAAGGAAGAAGGCCTTAGCACCCGGCTCTTGGCTCTGGTGGTTTTGTTC  
TTTATCGTTGGTGTAAATTATTGGGAAGATTGCCTTGTAG

**1-4:** *VAPB (P56S)*

ATGGCGAAGGTGGAGCAGGTCTGAGCCTCGAGCCGCAGCACGAGCTCAAATTCGAGGTCCCTTCACCGATGTTGT  
CACCACCAACCTAAAGCTTGGCAACCCGACAGACCGAAATGTGTGTTTTAAGGTGAAGACTACAGCACCACGTAGGT  
ACTGTGTGAGGtCCAACAGCGGAATCATCGATGCAGGGGCCTCAATTAATGTATCTGTGATGTTACAGCCTTTTCGAT  
TATGATCCCAATGAGAAAAGTAAACACAAGTTTATGGTTTCAGTCTATGTTTGCTCCAAGTACACTTCAGATATGGA  
AGCAGTATGGAAGGAGGCAAAACCGGAAGACCTTATGGATTCAAAACTTAGATGTGTGTTTGAATTGCCAGCAGAGA  
ATGATAAACCACATGATGTAGAAATAAATAAAATTATATCCACAAGTGCATCAAAGACAGAAACACCAATAGTGTCT  
AAGTCTCTGAGTTCTTCTTTGGATGACACCGAAGTTAAGAAGGTTATGGAAGAATGTAAGAGGCTGCAAGGTGAAGT  
TCAGAGGCTACGGGAGGAGAACAAGCAGTTCAAGGAAGAAGATGGACTGCGGATGAGGAAGACAGTGCAGAGCAACA  
GCCCCATTTTCAGCATTAGCCCCAACTGGGAAGGAAGAAGGCCTTAGCACCCGGCTCTTGGCTCTGGTGGTTTTGTTC  
TTTATCGTTGGTGTAAATTATTGGGAAGATTGCCTTGTAG
