# Supplementary material for: Yeast Models of Amyotrophic Lateral Sclerosis Type 8 Mimic Phenotypes Seen in Mammalian Cells Expressing Mutant VAPBP56S
Source: MDPI journal article supplement (doi:10.3390/biom13071147), 2023-07-19
Supplement: s1 [file s1]

## Supplementary File 2: Pairwise alignments of human ALS-linked proteins with yeast homologs

Yellow highlight: identical amino acid

Blue highlight: similar amino acid

Red text: dissimilar amino acid, ALS-linked in human

2-1: ALS1 (*SOD1*)

2-2: ALS4 (*SETX*)

2-3: ALS8 (*VAPB*)

2-4: ALS11 (*FIG4*)

2-5: ALS13 (*ATXN2*)

2-6: ALS14/FTD-ALS6 (*VCP*)

2-7: ALS15 (*UBQLN2*)

2-8: ALS16 (*SIGMAR1*)

2-9: ALS17/FTD-ALS7 (*CHMP2B*)

2-10: ALS18 (*PFN1*)

2-11: ALS20 (*HNRNPA1*)

2-12: ALS22 (*TUBA4A*)

2-13: ALS25 (*KIF5A*)

2-14: ALS26 (*TIA1*)

2-15: ALS27 (*SPTLC1*)

2-16: FTD-ALS2 (*CHCHD10*)

2-17: FTD-ALS5 (*CCNF*)

## 2-1: CLUSTAL O(1.2.4) multiple sequence alignment [ALS1]

|        |                                                               |     |
|--------|---------------------------------------------------------------|-----|
| hsSOD1 | MATKAVCVLKGDPVQGIINFEQKESNGPVKVGWSIKG-LTEGLHGFIHVEFGDNTAGCT   | 59  |
| scSOD1 | -MVQAVAVLKGDAGVSGVVKFEQASESEPTTVSYEIAGNSPNAERGFHIEHFGDATNGCV  | 59  |
|        | .:.*.*****.*.:::***. . . *. . * . * :. :.***:***** * **.      |     |
|        |                                                               |     |
| hsSOD1 | SAGPHFNPLSRKHGGPKDEERHVGDLGNVTADKDGVAIVSIEDSVISLSGDHCIIGRTLIV | 119 |
| scSOD1 | SAGPHFNPFKKTHGAPTDEVHRHVGDMGNVKTDENGVAKGSFKDSLILKLGPTSVVGRSVV | 119 |
|        | *****.:.:.*. . *. * * * * * .***.:.:.***. *:***.*. * .:.**: * |     |
|        |                                                               |     |
| hsSOD1 | VHEKADDLGKGGNEESTKTGNAGSRLACGVIGIAQ                           | 154 |
| scSOD1 | IHAGQDDLGKGDTEESLKTGNAGPRPACGVIGLTN                           | 154 |
|        | :* *****.*** ***** * *****:..                                 |     |

## 2-2: CLUSTAL O(1.2.4) multiple sequence alignment [ALS4]

|        |                                                                           |     |
|--------|---------------------------------------------------------------------------|-----|
| hsSETX | MSTCCWCTPGGASTIDFLKRYASNTSPSGE----FQTA--DEDLC--YCLECVAEYHKARD             | 52  |
| scSEN1 | -----MNSNNPDNNNSNNINNNNNKDKDIAPNSDVQLATVYTKAKS                            | 40  |
|        | **.*...:      ::      *:~:~      ::  .:  *  *~:~.                         |     |
| hsSETX | ELPFLHEVLWELETLRRLINHFEEKSMKAEIGDDDELYIVDNNGEMPLFDITGQDFENKLRV            | 112 |
| scSEN1 | YIPQIEQVYQG-----                                                          | 51  |
|        | :*  .:~*                                                                  |     |
| hsSETX | PLLEILKYPYLLLHERVNELCVEALCRMEQANCSEFQVFDKHPGIYLFVHPNEMVRRWAI              | 172 |
| scSEN1 | -----TNPN-----I                                                           | 56  |
|        | .:~*                                  *                                   |     |
| hsSETX | LTARNLGKVDRDDYYDLQEVLLCLFKVIELGLLESPDIYTSSVLEKKGKLILLPSHMYDTT             | 232 |
| scSEN1 | QEAKLLG-----ELLQVL-A---EVPKGTHLFCPILEPISIFSLTIFSFNE-                      | 99  |
|        | *:  **                  *:~*  *          :  .:  .:~.  .:~*  .:~*  .:~.    |     |
| hsSETX | NYKSYWLGICML--LTILEEQAMDSLGLGSDKQNDFMQSILHTMEREADDD-----SVD               | 284 |
| scSEN1 | EATATWLKNHFNPILSVCD-KCILNFARGKCK---MLQH--FATQRHVPHEHVAKFNDIV              | 153 |
|        | :  .:  **      :  *:~:  :  .:~.  .:  *  *      :~*  .:~*:~.  .:      .:~. |     |
| hsSETX | PFWPALHCFMVIL-----DRLG-----SKVWGQLMDPIVA-----FQTIINNA                     | 322 |
| scSEN1 | CQWRVEAVFPILRNISVNDNTGINITNEIETAMYECLCNPHMLRLNKQLKATFEAIF-KF              | 212 |
|        | *  .      *  :~      *  *                  :  .:~  *  *:~      *:~*:~:  . |     |
| hsSETX | SYNREIRHIRNSSVRTKLEPESYLDMMVTCSEQIVYNNPEKTKKDSGWRTAICPDYCPNM              | 382 |
| scSEN1 | FYDTKHR--LLDVTNPLSIKTFISGVIFC-----W-CEGSKEENEWSRAFLKDLYSRN                | 262 |
|        | *:  :  *      .*  *  .:~:~:~:~:~*          :  *  *:~:~.  *  *:~*  .       |     |
| hsSETX | YEEMETLASVLQSDIGQDMRVHNSTFLWFIPFVQSLMDLKDGLGVAYIAQVNVNHLHYSEVKE           | 442 |
| scSEN1 | FHI-----NL-----                                                           | 267 |
|        | :.                                  *:~                                   |     |
| hsSETX | VLNQTDVAVCDKVTEFFLLILVSVIELHRNKKCLHLLWV-SSQQWVEAVVKC-----                 | 492 |
| scSEN1 | ---SNLTPDIIIEVY-----IHILFLQNPANWTEIVVSQFWSRLLPVF                          | 307 |
|        | :~.  *  :~*:~                  *:~*:~.  .:~*  *~.                         |     |
| hsSETX | AKLPTTAFTSRSEKSSG-NCSEKGTAMISLHSMPSNSVQLAYVQLIRSLKKEGYQLGQ                | 551 |
| scSEN1 | NLFDKDVFIIEYFQVQPNVESLKKTFKFPLEPIFKMWYNHLSKSYHDKPLDFLRLGLTMFL             | 367 |
|        | :  .:~*  .:  .:~.  *  *  :  .:~*  *  .:~*:~  .:~*  *  :                   |     |
| hsSETX | QSLCKRFWDKLNLFRLGNLSLWQLTSQETHELQSCCLKIIRNIKFKAPPCNTFVDLTSA               | 611 |
| scSEN1 | NKFGSEFWSKIIEPFTFHSI-----LDIIIFNR-----                                    | 393 |
|        | :~:~  .:~*~*~*~*~*~*  .:                  *  *~:~.                        |     |
| hsSETX | CKISPASYNKEESEQMGKTSRKDMHCLEASSPTFSKEPMKVDSVLIKADNTIEGDNNEQ               | 671 |
| scSEN1 | -----DSFPIKLIKIQDNPIVEH-----QTE-                                          | 414 |
|        | *:~  :~*:~*~.  .:~      .:~*                                              |     |
| hsSETX | NYIKDVKLEDHLLAGSCLKQSSK--NIFTE-RAEDQIKISTRKQ-KSVKEISSY-----T              | 722 |
| scSEN1 | VYFQ-----LTGSVTDLLSWTLFPYHALSPSKRIQMVRKVSMAFLRIIANYPCLKSI                 | 466 |
|        | *~:~                  *~*~*  *  .:~      .:~*~:~:~  .:  .:~*~*~.          |     |
| hsSETX | PKDCTSRNGPERGCDRGIIVSTRLLTDSSTDALEKVSTS---NEDFSLKDDALAKTSKRK              | 779 |
| scSEN1 | PKACLMNSA-----TALLRAVLTIKENERAMLYKNDEF-----                               | 500 |
|        | **  *  ...                  *  *~.  *  *  .:~  :~  *~*~:~                 |     |
| hsSETX | TKVQKDEICAKLSHVIAKQHRKSTLVDNTINLDEN-LTVSNIESFYSRKDTGVQ--KGD               | 835 |
| scSEN1 | -----TVLLTKTDSRALLNNPLIQDIIIRSASNPNDFYPGLGAASASVATST                      | 547 |
|        | *:~  .:  .:~*:~*~:~  *  .:~*~*~*~*~  .:~      .:~.                        |     |

[illegible]

|        |                                                                                                                   |      |
|--------|-------------------------------------------------------------------------------------------------------------------|------|
| hsSETX | TFETVAQEWLNSPNRENFYQLQV----RKFPADYIKYWE-F-AVYLEECEELAKQLYPKEN                                                     | 1808 |
| scSEN1 | SWQGLCS----SRDREDYKPFISIIVGNRTAVSDFYDVYASVAKQVIQDCGISE-----S<br>::: .. * :*: : : * . :*: . : . :*: : : .          | 1214 |
| hsSETX | DLVFLAPERINEEEKDTERNDIQDLHEYHSGYVHKFRRTSVMRNGKTECYLSIQTQENFP                                                      | 1868 |
| scSEN1 | DLIVMAYLPDFRP---DKRLSSDDFKKAQHTCLAKVRTLKNTKGGNVDTVLRHNRHSFS<br>*: :*: . :* . :*: : : :* . . :*: : * : :*:         | 1271 |
| hsSETX | AN--LNELVNCIVISSLVTTQRKLKAMSLGSRNQLARAVLNPNPMDFCTKDLLTTTTER                                                       | 1926 |
| scSEN1 | KFLTLRSEIYCVKVMQMTTIEREYSTLEGLEYD-LVGQILQAKPSPPVNVD-----AAE<br>* . : * : : :*: :*: :*: * :* . :*: :* . *          | 1325 |
| hsSETX | IIAYLRDFNEDQKKAJETAYAMVKHSPSVAKICLIHGPPGTGKSKTIVGLLYRLLTENQR                                                      | 1986 |
| scSEN1 | IETVKKSYKLN-----TSQAEIIVNSVSKEGFSLIQGPPTGKTKTILGIIGYFLSTKNA<br>* : :*: : : : :* * :*: :*: :*: :* :* :* :*         | 1380 |
| hsSETX | KG-----HSDENSNAKIKQNRVLVCAPSNAAVDELMMKIIIEFKEKCKDKKNPLGN                                                          | 2037 |
| scSEN1 | SSSNVIKVPLEKNSSNTEQLLKKQKILICAPSNAAVDEICLRKSGVYDKQ-----GH<br>.. :*: :* :*: :*: :*: :* :* :* :*                    | 1433 |
| hsSETX | CGDINLVRLGPEKSINSEVLKFSLDSQVNRHMKE-----LPSHV-QAMHKRKEFL                                                           | 2087 |
| scSEN1 | QFKPQLVRVGRSDVNVVAIKDLTLEELVDKRIGERNYEIRTDPELERKFNNNAVTKRREL<br>. :*: :* . :* : :*: . :*: : : * . :* :*: :        | 1493 |
| hsSETX | DYQLDELSRQRALCRGGR----EIQRQELDENISKVSKERQELASK----IKEVQGR                                                         | 2138 |
| scSEN1 | -GKLDSESGNPESPMSTEDISKLQLKIRELSKIINELGRDRDEMREKNSVNYRNRDLDRR<br>:*. * : . : :*: :* :*: :*: :* . * : : :           | 1552 |
| hsSETX | KTQSIIILESHIICCTLSTSGGLLLESAFRGQGGVPFSCVIVDEAGQSCEIETLTPLIHR                                                      | 2198 |
| scSEN1 | NAQAHILAVSDIICSTLGSAGHDL----ATMGIKFDTVIIDEACQCTELSSIIPLRYG<br>:*. * : *. :*. :*. * :* . * :* . :*. :*. * :*: :* : | 1607 |
| hsSETX | CNKLILVGDPKQLPPTVISMKAQEYGYDQSMARFCRLLEENVEHNMISRLPILQLTVQY                                                       | 2258 |
| scSEN1 | GKRCIMVGDPNQLPPTVLSGAASNFKYNQSLFVRMEKN-----SSPYLLDVQY<br>: :*: :*: :* :* :* :* :* :* :* :* :* :* :* :*            | 1655 |
| hsSETX | RMHPDICLFPSNYVYNRNLKTNRQTEAIRC---SSDWPFQPYLVFDVGDGSERR--DNDS                                                      | 2313 |
| scSEN1 | RMHPSISKFPSSEFYQGRKDGPGMDILNKRPPHQLPLAPYKFDFIISGRQEQNAKTMS<br>***. * . :*. :*. :* :* :* :* :* :* :* :* :* :*      | 1715 |
| hsSETX | YINVQEIKLVMIEIKLIKDKR-KDV-SFRNIGIITHYKAQKTMIQKDLKDFDRK--GPA                                                       | 2369 |
| scSEN1 | YTNMEEIRVAIELVDYLFRKFDNKIDFTGKIGIISPYREQMKMRKEFARYFGGMINKSI<br>* :*: :*: :*: :* :* :* :* :* :* :* :* :* :*        | 1775 |
| hsSETX | EVDTVDAFQGRQKDCVIVTCVRANSIQGSIGFLASLQRLNVTITRAKYSFILGHLRTL                                                        | 2429 |
| scSEN1 | DFNTIDGFQGEKEIILISCVRADDTKSSVGFLKDFRNMNVALTRAKTSIWVLGHQRLA<br>:*. :*. :*. :* :* :* :* :* :* :* :* :* :* :* :*     | 1835 |
| hsSETX | ENQHWNQLIQDAQRGAIKTCCKNYRHDVAVKILKLPVLQRLTHPTIAPEGSRPQGG                                                          | 2489 |
| scSEN1 | KSKLWRDLIEDAKDRSCLAYACSGFLDPRNNRAQSI--L-RKFNVFV--PSEQEDDYK<br>: :* :*: :*: :* :* :* :* :* :* :* :* :* :*          | 1888 |
| hsSETX | LPSSKLDSGFAKTSVAAS--LYHTPSDSKEITLTVTSKDPER-----PPVHDQLQDP--                                                       | 2539 |
| scSEN1 | LPMEYITQGPDEVKSNKDTKKRRVVDEGEEADKAVKKKKKKKKKKSKADDKKKNNKK<br>** . : * :* . :* :* :* :* :* :* :* :* :* :*          | 1948 |
| hsSETX | --RLLKRMGIEVKGIGFLWDPQPSPPQHPGATPPTGEPGFVHVHQLSHIQQPAAVVAAL                                                       | 2597 |
| scSEN1 | AESPSTSSGTTKKSSIFGGMSP-----SAVVPK---TFPDVD-----SNKKAADVVGKK<br>. * :* :* :* :* :* :* :* :* :* :* :* :*            | 1995 |
| hsSETX | SS-----HKPPVRGEPFAASPEASTCQSKCDD                                                                                  | 2624 |
| scSEN1 | KNNKHVCFSDDSFIPRNDPEIKVTRSLSSVLKEQLGLKETRTISPPEISNNE--DDD<br>.. : : :* * . : *                                    | 2053 |

|        |                                                              |      |
|--------|--------------------------------------------------------------|------|
| hsSETX | PEEELCHRREARAF----SEGEQEKCGSETHHTRNSRWDKRTLEQEDSSS-----      | 2671 |
| scSEN1 | DEDDYTPSISDSSLMKSEANGRNRRVASHNQ-NFSASIYDDPQVSQAKQTQVPAAITKHR | 2112 |
|        | *:: . :: ::*.:*: . * :*. :.* ...                             |      |
| hsSETX | -----KKRKLL-----                                             | 2677 |
| scSEN1 | SSNSVLSGSSRIILTASDYGEPNQNGQNGANRTLSQHVGNANQYSTAPVGTGELHETLPA | 2172 |
|        | . ::*                                                        |      |
| hsSETX | -----                                                        | 2677 |
| scSEN1 | HPQDSYPAEAEDPYDLNPHPQPQSSAFKGP GSGPTGTRNSSRRNASSSPFIPKKRKPRS | 2231 |

2-3: CLUSTAL O(1.2.4) multiple sequence alignment [ALS8]

```

hsVAPB      MAKVEQVLSLEPQHELKFRGPFTDVVTTNLKLGNPTDRNVCFKVKTTAPRRYCVRPNSGI      60
scSCS2      MSAV----EI-SPDVLVYKSPLTEQSTEYASISNNSDQTIAFKVKTAPKFYCVRPNAAV      55
              *: *      .:      . * :.:*: *: *      .:.* :.:.:*****: *****: :.:
              .:      . * :.:*: *: *      .:.* *: *      .:      *: .: : *

hsVAPB      IDAGASINVSVMQLQPFDDYDPNE--KSKHKFMVQSMFAPTD--SDMEAVWKEAKPEDL--      114
scSCS2      VAPGETIQVQVIFLGLTEEPAADFCKRDKFLVITLPSPYDLNGKAVADVWSDLEAEFKQQ      115
              : * :*:*.*: : : *      *.:*:*: : : * *      . :      **: .: : *

hsVAPB      -MDSKLRVCFELPAENDKPHDVEINKIISTTASKTETPIVSKSLs----SSLDDETEVKV      169
scSCS2      AISKIKVKYLISPDVHPAQNQNIQE-----NKETVEPVVQDSEPKEVPVAVNEKEVPAAE      170
              :..*:: : : : . : :*: :      .:* **:..*      : :.:.*

hsVAPB      MEECKRLQGEVQRLREENKQ-----FKEEDGLR-MRKTVQSNSPI--SALAPTGKEEGLS      221
scSCS2      P---ETQPPVQVKKEEVPVQKTVPHENEKQTSNSTPAPQNQIKEAATVPAENE-SSS      225
              . * ** :**      . .*: : ..*      . * :* .*: :* . *

hsVAPB      TRLLAL-VVLFFIVGVIIGKIAL      243
scSCS2      MGIFILVALLILVLGWFYR----      244
              :: * .:***** :

```

CLUSTAL O(1.2.4) multiple sequence alignment [ALS8]

```

hsVAPB      MAKVEQVLSLEPQHELKFRGPFTDVVTTNLKLGNPTDRNVCFKVKTTAPRRYCVRPNSGI      60
scSCS22      -----MRI-VPEKLVFKAPLNKQSTEYIKLENDGEKRVIFKVRTSAPTKYCVRPNVAI      52
              : :      .:* **:..* * :** *      :.* ***:*:** :*****.*

hsVAPB      IDAGASINVSVMQLQPFDDYDP---NEKSKHKFMVQSMFAPTD-----TSDMEAVWKEAKP      111
scSCS22      IGAHESVNVQIVFLGLPKSTADDEMDQKRDKFLIVTLPIPAAYQNVEDGELLSDWPNLEE      112
              *. * :*:*.*: : .      :.:.**: : : * :      .: : * : :

hsVAPB      E---DLMSKLRVCFELPAENDKPHDVEINKIISTTASKTETPIVSKSLSSSLDDETEVKK      168
scSCS22      QYKDDIVFKKIKI-FH-----SAPTKYCVRPNVAI      127
              : *:: .*: : *.

hsVAPB      VMEECKRLQGEVQRLREENKQFKEEDGLRMRKTVQSNSPISAL-APTGKEEGLSTRLLA-      226
scSCS22      -----SVL-----PKRKPSGNHDAESARAPSAGNGQSLSSRALLI      162
              . :      **      .:. **      :*: :.**: *

hsVAPB      LVVLFFIVGVIIGKIAL      243
scSCS22      ITVIALLVGWIYY---      175
              :.*: :*: *

```

**2-4:** CLUSTAL O(1.2.4) multiple sequence alignment [ALS11]

|        |                                                                   |     |
|--------|-------------------------------------------------------------------|-----|
| hsFIG4 | -----MPT---AAPIISSVQKLVLYETRARYFLVGSNNAETKYRVLKID                 | 42  |
| scFIG4 | MNNDAMEHTLGGGILTTSGSKQRKTSKFVMGKYTLIYETKDRMYIVGSNKRETMFRILEID     | 60  |
|        | : * : * . * * * : * : * * * : * : * : * *                         |     |
| hsFIG4 | RTEPKDLV-IIDRHHVYTQQEVRELLGRDLGNRTKMGQKGSSGLFRAVSAFGVVGFEVRF      | 101 |
| scFIG4 | LTVPRGELTVLEDNVFFTRNEIMNVLASLE-----EATEDGLHKKITGYGLLGFIKF         | 112 |
|        | * * . : : * . . * * * : * . * : : * * . * : * * * * *             |     |
| hsFIG4 | LEGYYIVLITKRRKMADIGGHAIYKVEDTNMIYIPNDSVR-VTHPDEARYLRIFQNVDLS      | 160 |
| scFIG4 | TCWYYLIMVTKYSQVAVIGGHGIYHIDGIDIIPITNNYKKPEKSSDEARLLNIFKDLDT       | 172 |
|        | * * : * * : * * * * * . : * * * : : . * * * * * . * * : * * :     |     |
| hsFIG4 | SNFYFSYSYDLSHSLQYNLTVLMPLEMLKSEMTQNRQESFDIFEDEGLITQGGSGVFGI       | 220 |
| scFIG4 | KTFYFSYTYDITNTLQTNILREKLK--AV-----DRCDITIPC-----GI                | 210 |
|        | . * * * * : * * : * : : * : : : : * : : * * * * *                 |     |
| hsFIG4 | CSEPYMKYVWNGELLDIIKST--VHRDWLLYIIHGFQGSKLLIYGRPVYVTLIARRSSK       | 278 |
| scFIG4 | -TDYNEMFVWNNLLSPIFACIDTVDFWFQCIHGFIDQVNVSVLGKSIYITLIARRSHH        | 269 |
|        | : : : * * . * * . * : . * * : * * * * . * : : * : * : * * * * *   |     |
| hsFIG4 | FAGTRFLKRGANCEGDVANEVETEQLCDASVMSF-----TAGSYSSYVQVRGSVPL          | 330 |
| scFIG4 | FAGARFLKRGVNNKGHVANEVETEQLVTDMLTPFHQPGNGFFDSDRYTSFVQHRGSIPL       | 329 |
|        | * * : * * * * . * : * . * * * * * * : * : * : : * : * : * * : * * |     |
| hsFIG4 | YWSQDISTMMPKPPITLDQADPFHAHVAALHFDQMFQRFQSP-IIILNLVKEREKRKHERI     | 389 |
| scFIG4 | YWTQDASNLTTKPPIRINVDPFFSPAALHFDNLFQRYGGGTIQILNLIKTKKEKTPRET       | 389 |
|        | * * : * * . : * * * : : * * * * * : * * : * * : * * : * * : *     |     |
| hsFIG4 | LSEELVAAVTYLNQFLPPEHTIVYIPWDMAKYTKSKLCNVLDRLNVIAESVVKKTGFFVN      | 449 |
| scFIG4 | LLWEFEQCIDYLNFLPTLKKLDYTSWDMRSASKQDQGQVIEFLEKYAVNTVTTTGIFHN       | 449 |
|        | * * : . : * * : * * * : : * * * : : * . . . : * : * * . * * : * * |     |
| hsFIG4 | RPDSYCSILRPDEKWNELGGCVIPTGRLQTGILRTNCVDCLDRTNTAQFMVGKCALAYQL      | 509 |
| scFIG4 | GPDF-----ASTKIQEGICRSNCIDCLDRTNAAQFVIGKRALGCQL                    | 490 |
|        | * * : : * * * : * * : * * * * * : * * : * * . * *                 |     |
| hsFIG4 | YSLGLIDKPNLQFDTDAVRLFEELYEDHGDTLISLQYGGSQLVHRVKTYRKIAPWTQHSKD     | 569 |
| scFIG4 | KSLGIIDNSYLEYDSDIVNLTFLHDLGDTIALQYGGSHLVNTMETYRKINQWSSHSRD        | 550 |
|        | * * : * * : * * : * * : * * : * * * * : * * : * * * * : * : * *   |     |
| hsFIG4 | IMQTLSTRYYSNAFSDADRQDSINLFLGVFHPTEGKPHLWELPTDFYLHHKNTMRLLPTRR     | 629 |
| scFIG4 | MIESIKRFYSNSFVDAQRQDAINLFLGHYSWREGFPSLWEMNTDFYLHNAYSL--NMPKR      | 608 |
|        | : : : : * : * * : * * : * * * * : * * * * * : * * : * * : *       |     |
| hsFIG4 | SYTYWWTPPEVIKHLPLPYDEVICAVNL--KKLIVKKFKHYEEI-DIHNEFFRPYELSS       | 685 |
| scFIG4 | SYIHHWWDYNIKSVKELINEELIATGNDVTREKIIKNVRGYPGAFDNYWNEYYPERSVTW      | 668 |
|        | * * : * * . * * : : * : * . : : * : * : * : * : : * * : * : *     |     |
| hsFIG4 | FDDTFCLAMTSSARDFMPK-TVGIDPSPFTVRKPDETGKSVLG---NKS-N-REEAVLQR      | 739 |
| scFIG4 | IRDLFAYNMNSTRRYHNALSQDKAMSPFTSRKQSWLNNKLKMITSSKSLEKAEGRVVET       | 728 |
|        | : * * . * * : * . . * * * * . . : : . * * : * * :                 |     |
| hsFIG4 | KTAASAPPPPSEEAVS---SSSEDDSGTDREEGSVSQRSTPVKMTDAGDSAKVTENVV        | 795 |
| scFIG4 | TDLDRDTSKQLELELYEHLHIISDRSQKLEEKMNSFSYSKYPIFISH-----ESSEI         | 781 |
|        | . * * : . * * . * : . * * . * : : * . . . :                       |     |
| hsFIG4 | QPMKELYGINLSDDLSEEDFSIYSRFVQLGQSQHKQDKNSQQPCSRCSGDGVIKLTPISAF     | 855 |
| scFIG4 | PPMRKVIGEPLVDIA-----EDFTDVYDDDDGDDE---NDEMTTEALLIAPDHVS           | 829 |
|        | * * : : * * * . * : : : . . * : . . : : * : *                     |     |



|        |                                                                                       |     |
|--------|---------------------------------------------------------------------------------------|-----|
| hsFIG4 | SQDNIYEVQ-----PPRVDRKSTEIFQAHIQASQGIMQPLGKEDSSMYREYIRNRYL--                           | 907 |
| scFIG4 | VDEKFYEKVLNVDDYKPALDDYS-----AVI-----HIKPDNLQLYRDLCFSKDIQL                             | 876 |
|        | ::::**                  * :* *                 * *                 :  :: .:**:*  .: : |     |

|        |     |     |
|--------|-----|-----|
| hsFIG4 | --- | 907 |
| scFIG4 | DFQ | 879 |

|         |                                                                                      |     |
|---------|--------------------------------------------------------------------------------------|-----|
| hsATXN2 | MRSAAAAPRSPAVATESRRFAAARWPGRWSLQRPARRSGRGGGGAAPGPYPSPAAPPPPGP                        | 60  |
| scPBP1  | -----                                                                                | 0   |
|         |                                                                                      |     |
| hsATXN2 | GPPPSRQSSPPSASDCFGSNGNGGGAFRPGSRRLGLGGPRPFVVLLPLASPGAPPAA                            | 120 |
| scPBP1  | -----                                                                                | 0   |
|         |                                                                                      |     |
| hsATXN2 | PTRASPLGARASP PRSGVSLARPAGCPRFACEPVYGPLTMSLKPRQQQQQQQQQQQQQQ                         | 180 |
| scPBP1  | -----                                                                                | 0   |
|         |                                                                                      |     |
| hsATXN2 | QQQQQQQPPPAANVRKPGGSGLLASPAAAPSPSSSVSSSSSATAPSSVAATSGGGRPG                           | 240 |
| scPBP1  | -----MKG NFRKR D-----SS-TNSRKGG----                                                  | 18  |
|         | . * . ** .                         ** . : . **                                       |     |
|         |                                                                                      |     |
| hsATXN2 | LGRGRNSNKGLPQSTISFDGIYA-----NMRMVHILTSVVGSKCEVQVKNGGIYEGV                            | 292 |
| scPBP1  | NSDSNYTNGGVPNQNNS-SMFYENPEITRNDDRQDYLLANSIGSDVTVTVTSGVKYTGL                          | 77  |
|         | . .. : * *:*. . * . : *              : * ::*: . **: . * *. . * * :                   |     |
|         |                                                                                      |     |
| hsATXN2 | FKTYS PKCD---LVLDAAH--EKSTESSGPKREEIMESILFKCSDFVVVQFKDMDSSY                          | 346 |
| scPBP1  | LVSCNLESTNGIDVLRFP RVADSGVSVD DLAKTLGETLLIHGEDVAE LELKNIDL SL                        | 137 |
|         | : : . . . : ** : : .....* . : : *::*: . *. . ::*:.* *                                |     |
|         |                                                                                      |     |
| hsATXN2 | AKR-----DAFTDSAISA KVN GEHK EKDL E PWD AG EL                                         | 378 |
| scPBP1  | DEKWEN SKAQ ETTPARTNIEKER VNG ESNE VT KFRTDV DIS GSGREI KER KLE KW TP EE G           | 197 |
|         | : :                                 * .. : . * **:.*** * *                           |     |
|         |                                                                                      |     |
| hsATXN2 | TANE ELE--ALENDV SNGWDPND MF R Y NE EN Y GV STYDSSL SSYTV PLERDNSEEF LKR             | 436 |
| scPBP1  | AEHF DI NK GA LED DS AS W ---D Q F AV NE KK FG VK S TF DE HLY TTK IN KDD P ---NY SKR | 251 |
|         | : : :::         :* * .*   * * **:::** **:. * : . :         :: **                     |     |
|         |                                                                                      |     |
| hsATXN2 | EARANQLAE EI ESS AQYKA-----R VALENDR SEEEKYTA VQRNSSERE-----GH                       | 483 |
| scPBP1  | LQE AERI AK EIES QGT SGNIH I AE DR GI IIDDS GLDEEDLYSGVD RR GD ELLA ALKS NSK         | 311 |
|         | . *:.:*:****..                         : :.... **. *:.*:*. . . *                     |     |
|         |                                                                                      |     |
| hsATXN2 | SINTRENKYIP PGQRNR EVISWGSGRQNSPRMGQP GS GSMPSRSTSHT SD FN PNSGSD QR                 | 543 |
| scPBP1  | PNSN KG NR Y VPPT LR QQPH ----- M-D----- PAI ISS ---- NSN KN EN                      | 347 |
|         | .. : *:*:* * : :                         * :             * : *         **.....       |     |
|         |                                                                                      |     |
| hsATXN2 | VVNGGVPW PS PC PSP SR PP SRY QS GP NSLP RA ATPTR PPPSRPPSRPSRPPSH PSAHGS             | 603 |
| scPBP1  | AVSTD TSTP AAAGAPEG KP PQKTSKNK KSLS-----                                            | 378 |
|         | *. . . . * : . :*...**: . . . : **                                                   |     |
|         |                                                                                      |     |
| hsATXN2 | PAPVSTM PK RMS SEGPPRM SP KAQRHP RNHR VSAGRGIS SG LEFV SHNP PSEAATPPVA               | 663 |
| scPBP1  | -----SKEAQ IEELKKFSEK-----FKVP--                                                     | 397 |
|         | : ...*.. :* .:             . *                                                       |     |
|         |                                                                                      |     |
| hsATXN2 | RTSPSGGTWSSV SVGP RLSPKTHRPRS PRQNSIGNTPSG PV LASPQA GI IPT EA VAMPI                 | 723 |
| scPBP1  | -----YDI PKDMLEV LKRSS STLKSN SSLPPK PI SKTPSAK-----                                 | 433 |
|         | .*:         . . : *         :* .. * * : :*.*                                         |     |
|         |                                                                                      |     |
| hsATXN2 | PAASPTPAS PAS NRA VTPS SEA KDSLQDQRONS--PAGNKENIKPNETSP SF S KAENKG                  | 781 |
| scPBP1  | -----TVSPTTQ ISAGKSESRRSGSNSIQQSSTGH TTRSSTSLRRR-NHG                                 | 478 |
|         | :*:*::: . . . :*:*. *         *.... : . :.* *: :         *.*                         |     |
|         |                                                                                      |     |
| hsATXN2 | ISPVVSEHRKQ IDDLK--KFKNDFRLQPSSTSES MDQLLNKNREG EKSRDL IKDKIEPSA                     | 839 |
| scPBP1  | --SFFGAK NP HTNDA KRVLFGKSFNMFIKSKE-A----HDEKKKGDD----ASE NM EP --                   | 525 |
|         | . . . . . : * *         * :* :         * :         :***:         :***                |     |

|         |                                                                                                             |      |
|---------|-------------------------------------------------------------------------------------------------------------|------|
| hsATXN2 | KDSFIENSSSNTSGSSKPNSPSISPSILSNTEHKRGPEVTSQGVQTSSPACKQEKDDKE                                                 | 899  |
| scPBP1  | --FFIEKPYF-----TAPTWLNTIEESY-----KTFFP----DED--T                                                            | 555  |
|         | ***:                               *: *..*..                               :* *               ::*           |      |
| hsATXN2 | EKKDAAEQVRKSTLNP---NAKEFNPRSFSQPKPSTTPTSPPRQAQPSPSMVGHQQP---                                                | 953  |
| scPBP1  | AIQEAQTRFQQRQLNSMGNAPGMNPAMGMNMGMMGFPMGGPSASPNPMMNGFAAGSMG                                                  | 615  |
|         | ::*   :::   **               .   :**               :                               *.*.*.* * *.             |      |
| hsATXN2 | --TPVYTQPVCFAPNMMYPVPVSPGVQPLYPIPMTPMPVNQAKT--YRAVPNMPQQRQDQ                                                | 1009 |
| scPBP1  | MYMPFQPPMFYHPSMPQMPVM-----GSNGAEEGGNISPHVP-----                                                             | 655  |
|         | *.   **.:   *.*               :**                                               * *:               .   *::* |      |
| hsATXN2 | HHQSAMMHPASAAGPPIAATPPAYST-----QYVAYSPQQFPNQPLVQ----HVPHYQ--                                                | 1058 |
| scPBP1  | ---AGFMA--AGPGAPMGAF--GYPGGIPFQGMMSGPSGMPANGSAMHSHGHSRNYHQT                                                 | 708  |
|         | :::*   :.   * *:. *               .*                               :.   *.: *   :               *   :**     |      |
| hsATXN2 | SQHPHVYSPVIQGNARMMAPPTHAQPGLVSSSATQYGAHEQTHAMYACPKLPYNKETSPS                                                | 1118 |
| scPBP1  | SHHGHHNSS-TSGHK-----                                                                                        | 722  |
|         | *:* * *               .*:                                                                                   |      |
| hsATXN2 | FYFAISTGSLAQQYAHPNATLHPHTPHQPSPATPTGQQQSQHGGSHPAPSPVQHHQHQA                                                 | 1178 |
| scPBP1  | -----                                                                                                       | 722  |
| hsATXN2 | QALHLASPQQQSAIYHAGLAPTPPSMTPASNTQSPQNSFPAAQQTVFTIHPSHVQPAYTN                                                | 1238 |
| scPBP1  | -----                                                                                                       | 722  |
| hsATXN2 | PPHMAHVPAHVQSGMVPSHPTAHAPMMLMTTQPPGGPQAALAQSAIQPIPVSTTAHFPY                                                 | 1298 |
| scPBP1  | -----                                                                                                       | 722  |
| hsATXN2 | MTHPSVQAHHQQL                                                                                               | 1312 |
| scPBP1  | -----                                                                                                       | 722  |

[illegible]

|          |                                                                                                                                                       |     |
|----------|-------------------------------------------------------------------------------------------------------------------------------------------------------|-----|
| hsUBQLN2 | MAENGESSGPPRSPRGPAAAQGSAAAPAEPKIIKVTVPKEKEEFVAVPENSSVQQFKEA                                                                                           | 60  |
| scDSK2   | -----MSLNIIHKSGQDKWEVNVAPESTVLQFKEA<br>:: : * : * . *         :* * *****                                                                              | 30  |
| hsUBQLN2 | I SKRFKSQTDLVLIFAGKILKDQDTLIQHGIHDGLTVHLVIKSQNRPQGQSTQPSNAAG                                                                                          | 120 |
| scDSK2   | INKANGIPVANQRLLIYSGKILKDDQTVESYHIQDGHSVHLVKSQ-PKPQTASAAGANNAT<br>*. *              :     ** ::*****: *: .: ***: ***** ..       :**   *:   : * *       | 89  |
| hsUBQLN2 | TNTTSASTPRSNSTPISTNSNPFGLSLGGLAGLSSLGL--SSTNFSELQSQMQQQLMA                                                                                            | 177 |
| scDSK2   | ATG---AAAGTGATPNMSSGQSAGFNPLADLTSAFYAGLYNMPSADMFGPDGGALNNDSN<br>:.       ::   .:**   :..:   *: . *.**..         *           *:::   :.   ::            | 146 |
| hsUBQLN2 | SPEMMIQIMENPFVQ----SMLSNPDLMRQLIMANPMQMQOLI-----QRNPEISHLLNN                                                                                          | 227 |
| scDSK2   | NQDELLRMENPI FQSQMNEMLSNPQMLDFMIQSNPQLQAMGPQARQMLOSPMFRQMLTN<br>. :   :::****.*         .*****:::   : * :***:* :               :. * :   :*. *         | 206 |
| hsUBQLN2 | PDIMRQTLEIARNPAMMQEMMRNQDLALSNLSEIPGGYNALRRMYTDIQEPMLNAAQE QF                                                                                         | 287 |
| scDSK2   | PDMIRQSMQFARMMDPNAGMG-----SA<br>**::**::::**               *                                                                                          | 229 |
| hsUBQLN2 | GGNPFASVGSSSSSGEGTQP SR TENRDLPNPWAPP PAT QSATTSTTTSTGSGSGNSSS                                                                                        | 347 |
| scDSK2   | GGA-----ASAFPAPGGDAPEE GS N T N T S S N T G N N A G T N A G<br>**                                 . : * * .   *       * . . * : : . . * . . * . . . . | 267 |
| hsUBQLN2 | NATGNTVAAAANYVASI-----FSTPGMQSL LQ QITENPQLIQNMLSAPYMRSM MQ SL S                                                                                      | 400 |
| scDSK2   | TNAGANTAANPF-ASLLNPALNPFANAGNAASTGM PAFDPALLASMFP FP VQA-----<br>. :* ..**   : **:               *: . *       :       : * * : .*: . *                 | 319 |
| hsUBQLN2 | QNPDLAAQMMLNSPLFTANPQLQEQMRPQLPAFLQQMQNP D T L S A M S N P R A M Q A L M Q I Q Q                                                                      | 460 |
| scDSK2   | -----                                                                                                                                                 | 319 |
| hsUBQLN2 | GLQTLATEAPGLIPSFTP GVGV GLTAIGPVGP VT P IG PI GP IV P FT P IG PI GP IPTG                                                                              | 520 |
| scDSK2   | -----                                                                                                                                                 | 319 |
| hsUBQLN2 | PAAP PG STGSGGPTGPTVSSAAPSETTSPTS ESG PN QQ FI QQ MV QAL AG AN AP QL NP EV                                                                            | 580 |
| scDSK2   | -----SQAEDTRPTEE<br>:: * :       **                                                                                                                   | 330 |
| hsUBQLN2 | RFAQQLEQLNAMGFLNR EANLQ ALI ATGGDINA AIER LLGSQ PS                                                                                                    | 624 |
| scDSK2   | RYEHQLRLND MGFFDFDRNVAA LR SG SVQ GALDSL NGDV-                                                                                                        | 373 |
|          | *::*:*.*** ****:: : * : * *   :*.**:*: : * . :                                                                                                        |     |

**2-8:** CLUSTAL O(1.2.4) multiple sequence alignment **[ALS16]**

```

hsSIGMAR1      MQWAVGRRWAWAALLLAVAAV-LTQVVWLWLGTQSFVFQREEIAQLARQYAG--LDHEL 56
scERG2         -----MKFFPLLLLLIGVVGYIMNVLFTTWLPT-NYMFDPKTLNEICNSVISKHNAEGL 53
                ::      **:.*. . . . .  ** * .::*: : : : : . . . . .  . *

hsSIGMAR1      AFSRLIVELRRLHPG-----HVLPEELQWVFVNAGGWMGAMCLLHASLSEYVLLFGTAL 111
scERG2         STEDLLQDV RDALASHYGDEYINRYVKEEWVFNNAGGAMGQMIILHASVSEYLILFGTAV 113
                : . *: ::* . . . . . : : : : *** ** ** * :***:***:***:***:
                : . *: ::* . . . . . : : : : *** ** ** * :***:***:***:***:

hsSIGMAR1      GSRGHSGRYWAEISDTIISGTFHQWREGTTKSEVFYPGETVVHGPGEATAVEWGPNTWMV 171
scERG2         GTEGHTGVHFADDYFTILHGTQIAALPYATEAEVYTPGMTHHLKKG YAKQYSMPGGSFAL 173
                *:***:***:***:***:***:***:***:***:***:***:***:***:***:***:
                *:***:***:***:***:***:***:***:***:***:***:***:***:***:

hsSIGMAR1      EYGRGVIPSTLAFALADTVFSTQDFLTLYTLRSYARGLRLELTT-YLFGQDP 223
scERG2         ELAQGWIPCM L PFGFLDTFSSTLDLYTLRTVYLTARDMGKNLLQNKKF---- 222
                * .: * ** . * *: ** . ** *: ** *: *: **.: : * *

```

**2-9: CLUSTAL O(1.2.4) multiple sequence alignment [ALS17/ALS-FTD7]**

|          |                                                                       |     |
|----------|-----------------------------------------------------------------------|-----|
| hsCHMP2B | ---MASLFKK-KTVDDVIKEQNRELRGTRAIIRDRAALEKQEKQLELEIKKMAKIGNKE           | 56  |
| scDID4   | MSLFEWVFGKNVTPQERLKKNQRALERTQRELEREKKLELQDKKLVSSEIKKSAKNGQVA          | 60  |
|          | : : * * * : : : : * * . *** : * : : * * * : * : * * * * * :           |     |
| hsCHMP2B | ACKVLAKQLVHLRKQKTRTFVSSKVTSMSTQTKVMNSQMKMAGAMSTAKTMQAVNKKM            | 116 |
| scDID4   | AAKVQAKDLVTRNYIQKFDNMKAQLQAISLRIQAVRSSDQMTRSMSEATGLLAGMNRTM           | 120 |
|          | * . ** ** : ** : * : : : : : * : : . . * . : * : ** : : : . : * . *   |     |
| hsCHMP2B | DPQKTLQTMQNFQKENMKMEMTEEMINDTLDDIFD-GSDDEEESQDIVNQLVDEIGIEIS          | 175 |
| scDID4   | NLPQLQRISMFEFEKQSDLMGQRQEFMDEAIDNVMGDEVDEDEEAEIVNKVLDEIGVDLN          | 180 |
|          | : : : : * : * : . * : * : : : * : : . * : * : : : * * . * * * * : : . |     |
| hsCHMP2B | GKMAKAPSAARSLPSASTSKATI-----SDEEIERQLKALGVD-                          | 213 |
| scDID4   | SQLOSTPQNLVSNAPIAETAMGIPEPIGAGSEFHGNPDDDLQARLNTLKKQT                  | 232 |
|          | . : : . : * . * : : * * : : : : * : * : * : :                         |     |

**2-10:** CLUSTAL O(1.2.4) multiple sequence alignment **[ALS18]**

|        |                                                              |     |
|--------|--------------------------------------------------------------|-----|
| hsPFN1 | MAGWNAYIDNLMADGTCQDAAIVGYKDSPSVWAAVPGKTFVNITPAEVGVLVGK--DRSS | 58  |
| scPFY1 | -MSWQAYTDNLIGTGKVDKAVIY-SRAGDAVWATSGGLS---LQPNEIGEIVQGFDNPAG | 55  |
|        | .*: ** ***:. *. :.*.* :. :. :***: * : : * *:* :* : :.        |     |
| hsPFN1 | FYVNGLTLLGGQKCSVIRDSLLQDGEFSMDLRTKSTGGAPTFNVTVTKTDLVLLMGKEG  | 118 |
| scPFY1 | LQSNGLHIQQQKFMLLRADDR-----SIYGRHDA-----EGVVCVVRTKQTVIIAHYPPT | 104 |
|        | : *** : *** :.* . * : * .: .*. .:*.*:*:::                    |     |
| hsPFN1 | VHGGLINKKCYEMASHLRRSQY                                       | 140 |
| scPFY1 | VQAGEATKIVEQLADYLIGVQY                                       | 126 |
|        | *:. * .* :.*.* **                                            |     |



| Sequence            | Score      |
|---------------------|------------|
| hsHNRNPA1<br>sCHRP1 | 0<br>60    |
| hsHNRNPA1<br>sCHRP1 | 0<br>120   |
| hsHNRNPA1<br>sCHRP1 | 35<br>180  |
| hsHNRNPA1<br>sCHRP1 | 95<br>239  |
| hsHNRNPA1<br>sCHRP1 | 155<br>293 |
| hsHNRNPA1<br>sCHRP1 | 215<br>339 |
| hsHNRNPA1<br>sCHRP1 | 253<br>399 |
| hsHNRNPA1<br>sCHRP1 | 281<br>459 |
| hsHNRNPA1<br>sCHRP1 | 330<br>508 |
| hsHNRNPA1<br>sCHRP1 | 372<br>534 |

|          |                                                               |     |
|----------|---------------------------------------------------------------|-----|
| hsTUBA4A | MRECISVHVQGAGVQMGNACWELYCLEHGIQPDGQMPSDK-TIGGGDDSFSTFFFCETGAG | 59  |
| scTUB1   | MREVISINVGQAGCQIGNACWELYSLEHGIKPDGHLEDGLSKPKGGEFGSTFFFHETGYG  | 60  |
|          | *** **::***** *:*****.*****:***::.. . *:::*:*** ** *          |     |
| hsTUBA4A | KHVPRAVFDLEPTVIDEIRNGPYRQLFHPEQLITGKEDAANNYARGHYTIGKEIIDPVL   | 119 |
| scTUB1   | KFVPRAIYVDLEPNVIDEVRNGPYKDLFHPEQLISGKEDAANNYARGHYTVGREILGDVL  | 120 |
|          | *.****::*****.*****:*****:*****:*****:*****:*****:***:*. **   |     |
| hsTUBA4A | DRIRKLSDQCTGLQGFLVFHSGGGTSGSFTSLLMERLSVDYGKSKLEFSIYPAPQVST    | 179 |
| scTUB1   | DRIRKLADQCDGLQGFLFTHSLGGGTSGSLGSLLEELSAEYGGKSKLEFAVYPAPQVST   | 180 |
|          | *****:*** *****. **:*** ***: ***:*.**.:*****:*****            |     |
| hsTUBA4A | AVVEPYNSILTTHTTLEHSDCAFMVDNEAIYDICRNLNLDIERPTYTNLNRLISQIVSSIT | 239 |
| scTUB1   | SVVEPYNTVLTTHTTLEHADCTFMVDNEAIYDMCKRNLDIRPSPFANLNLIQVSSVT     | 240 |
|          | :*** ***: :*****: **:*****:*. ***: ***: ***: ***: ***: *      |     |
| hsTUBA4A | ASLRFDGALNVDLTFQTNLVPYPRIHFPLATYAPVISAEKAYHEQLSVAEITNACFEP    | 299 |
| scTUB1   | ASLRFDGSLNVDLNEFQTNLVPYPRIHFPLVSYSPLSKSKAFHESNSVSEITNACFEP    | 300 |
|          | *****.*****.*****:*****:***:*. ***: ***: ***:*****.           |     |
| hsTUBA4A | NQMVKCDPRHGKYMACCLLYRGDVPKPDVNAAIAIKTKRSIQFVDWCPTGFKVGINYQP   | 359 |
| scTUB1   | NQMVKCDPRDGKYMATCLLYRGDVTTRDQRAVEQVKNKKTQVLVDWCPTGFKIGICYEP   | 360 |
|          | *****.***** ***** ***: ***: :*.**.:*:*****:*** *:*            |     |
| hsTUBA4A | PTVVPGGDLAKVQRAVCMLSNNTTIAIEAWARLDHKFDLMYAKRAVHVYVGEEMEEGEFS  | 419 |
| scTUB1   | PTATPNSQLATVDRAVCMLSNNTTSIAEAWKRIDRKFDMYAKRAVHVYVGEEMEEGEFT   | 420 |
|          | *. *.**.:**.:*****. ***** *:*.*****:*****:*****:              |     |
| hsTUBA4A | EAREDMAALEKDYEEVGIDSYEDEDEGEE                                 | 448 |
| scTUB1   | EAREDLAALERDYIEVGADSYAEEEEF--                                 | 447 |
|          | *****:***** *** *** *** ***: *                                |     |

**2-12 (continued):** CLUSTAL O(1.2.4) multiple sequence alignment **[ALS22]**

|          |                                                               |     |
|----------|---------------------------------------------------------------|-----|
| hsTUBA4A | MRECISVHVGQAGVQMGNACWELYCLEHGIQPDGQMPSDK-TIGGGDDSFSTFFCETGAG  | 59  |
| scTUB3   | MREVISINVGQAGCQIGNACWELYSLEHGIKEDGHLEDGLSKPKGGEFGSTFFHETGYG   | 60  |
|          | *** **.:***** *:*****.*****: **: :. . **.:*:* ** *            |     |
| hsTUBA4A | KHVPRAVFVDLEPTVIDEIRNGPYRQLFHPEQLITGKEDAANNYARGHYTIGKEIIDPVL  | 119 |
| scTUB3   | KFVPRAIYVDLEPNVIDEVRTGRFKELFHPEQLINGKEDAANNYARGHYTVGREIVDEVE  | 120 |
|          | *.*****.:*****.*****:*.* :.:*****.*****:***:* *               |     |
| hsTUBA4A | DRIRKLSdqCTGLQGFLVFHSGGGTSGSFTSLMERLSVDYGKKSKEFSIYPAPQVST     | 179 |
| scTUB3   | ERIRKMADQCDGLQGFLFTHSLGGGTGSGLSLLENLSYEYGKKSKEFAVYPAPQLST     | 180 |
|          | :****.:*** *****. **:*** ***: **:*.* ** :*****.:*****:***     |     |
| hsTUBA4A | AVVEPYNSILTHTTLEHSDCAFMVDNEAIYDICKRNLDIRPTYTNLNRLISQIVSSIT    | 239 |
| scTUB3   | SVVEPYNTVLTHTTLEHADCTFMVDNEAIYDICKRNLGISRPSFSNLNGLIAQVISSVT   | 240 |
|          | :*****.:*****.***:*****:***.*.* **.:*** ***:***:***:*         |     |
| hsTUBA4A | ASLRFDGALNVDLTEFQTNLVPYPRIHFPLATYAPVISAEKAYHEQLSVAEITNACFEP   | 299 |
| scTUB3   | ASLRFDGSLNVDLNEFQTNLVPYPRIHFPLVSYAPILSKKRATHESNSVSEITNACFEP   | 300 |
|          | *****:*****.*****:*****:***:* **.* ***:*****.                 |     |
| hsTUBA4A | NQMVKCDPRHGKYMACCLLYRGDVVPKDVNAIAAIAIKTKRSIQFVDWCPTGFKVGINYQP | 359 |
| scTUB3   | NQMVKCDPTKGKYMANCELYRGDVVTRDVQRAVEQVKNKKTVMVDWCPTGFKIGICYEP   | 360 |
|          | ***** :***** *****:***: *: :*.***:***:*****:*** *:*           |     |
| hsTUBA4A | PTVVPGGDLAKVQRAVCMLSNNTAIAEAWARLDHKFDLMYAKRAVHWYVGEEMEEGEFS   | 419 |
| scTUB3   | PSVIPSSSELANVDRAVCMLSNNTAIAADAWKRIDQKFDLMYAKRAVHWYVGEEMEEGEFT | 420 |
|          | *:*.*.:***:***:*****:***.**:***:*****:*****:*****:            |     |
| hsTUBA4A | EAREDMAALEKDYEVEGIDSYEDEDEGEE                                 | 448 |
| scTUB3   | EAREDLAALERDYIEVGADSYAEFF----                                 | 445 |
|          | *****:*****.* ** *                                            |     |

2-13: CLUSTAL O(1.2.4) multiple sequence alignment [ALS25]

|         |                                                                          |     |
|---------|--------------------------------------------------------------------------|-----|
| hsKIF5A | -----MAETNNECSIKVLCRFRPLNQAEIL----RGDKF--IPIFQG                          | 36  |
| scSMY1  | MHWNIISKEQSSSVSLPTLDSSEPCHIEVILRAIPEKGLQNNESTFKIDPYENTVLFRT              | 60  |
|         | ::: * *: * * : :           : * :   :::                                   |     |
| hsKIF5A | D----DSVVIGGKPYVFDVFPNTTQEQVYHACAMQIVKDVLAGYNGTIFAYGQTSSGK               | 92  |
| scSMY1  | NNPLHETTKETHSTFQFDKVF DANATQEDVQKFLVHPIINDVLNGYNGTVITYGPSFSGK            | 120 |
|         | :     ::.     :   *: **   *: ***: * :     * : ** * : ** * : ** *         |     |
| hsKIF5A | THTMEGKLHDPQLMGIIPRIARDIFNHIYSMDE--NLEFHIKVSFYFEIYLDKIRDLLDVT            | 150 |
| scSMY1  | SYSLIGSK---ESEGILPNICKTLFDTLEKNEETKGDSFSVSVLAFEIYMEKTYDLLVPL             | 177 |
|         | ::: *       :   *: *. * : : : :   : *   . * : *   * : * : * *            |     |
| hsKIF5A | KTN--LSVHEDKNR--VPFVKGCTERFVSSPEEILDVIDEGKSNRHVAVTNMNEHSSRSRSH           | 206 |
| scSMY1  | PERKPLKLRSSSKMDLEIKDICPAH-VGSYEDLRSYIQAVQNVGNRMACGDKTERSRSRSH            | 236 |
|         | .   *: *. * : : : . * : * * * : . * : : . : : . * * *                    |     |
| hsKIF5A | SIFLINIKQENMETEQKLSGKLYLVDLAGSEKVSKTGAEGAVLDIAKNINXLSLSALGNVI            | 266 |
| scSMY1  | LVFQLHVEQRNRKDDILKNSSLYLVDLHGAEKFDKRTESTLSQDALKKLNQSIEALKNTV             | 296 |
|         | : * : : : * * : :   . . * * * * * * : * * .       * * : * : * * * * : :  |     |
| hsKIF5A | SALA-----EGTKSYVPYRDSKMTRILQDSLGGNCRTTMFICCSPPSSYNDAETKST                | 317 |
| scSMY1  | RSLSMKERDSAYSAGKSHSSAYRESQLTEVLKDSLGGNRKTKVILTCFLSNVP--TTLST             | 354 |
|         | : * :               .       *: * : : : * : * * * * : * : : : *   *   * * |     |
| hsKIF5A | LMFGQRAKTIKNTAS-----VNLELTAEQWKKKYEKEKEKTKAQKETIAKLEAELSRWR-             | 371 |
| scSMY1  | LEFGDSIRQINNKVTDNTTGLNLKKKMDLFIQDMKIKDDNYV---AQINILKAEIDSLKS             | 411 |
|         | * * * :   : * * * :       : * * : . : : : . : : :       * * * * : . :    |     |
| hsKIF5A | -NGENVPETERLAGEEAALGAELCEETPVNDNSSIVVRIAPEERQKYEEE---IRRLYKQ             | 427 |
| scSMY1  | LHNKSLPEDDE-----KKMLN-TKKENIKLKLQLD SITQLLSS                             | 449 |
|         | : : : : * * : .               . : : . : : * . * : :   * * * . .          |     |
| hsKIF5A | LD--DKDDEINQQ-SQLIEKLKQQMLDQEELLVSTRGDNEKVQREL SHLQSENDAAKDEV            | 484 |
| scSMY1  | STNEDPNNRIDEEVSEILTKRCEQIAQLELSFDRQMNSNSKLQOELEYKKSKEEA----              | 504 |
|         | *   : . * : : : * : : : *   :       . . * . * : * : : : * : : : *        |     |
| hsKIF5A | KEVLQALEELAVNYDQ---KSQEVEEKSQQNQLLVDELSQKV-----ATMLSLESEL                | 533 |
| scSMY1  | -----LESMNVRLLLEQIQLOEREIQELLTNAILKGELETHTKLTETRSEIRIKSLESSV             | 558 |
|         | * * : * . :       : : : : *   * * * . * * : .               : * * * : :  |     |
| hsKIF5A | QRLQEVSGHQKRKRIAEVLNGLMKDLSEFSVIVNGEIKLPVEISGAIEEEFTVARLYISK             | 593 |
| scSMY1  | KELSL---NKSALPSPRRGSMSS-----SSGNTMLHIEEGSEISNSP-----WSAN                 | 601 |
|         | : . *       : : . * .   * * * .       . . * :   * * * . . * : . : : :    |     |
| hsKIF5A | IKSEVKS VVKRCRQLENLQVECHRKMEVTGRELSSCQLLISQHEAKIRSLTEYMQSVELK            | 653 |
| scSMY1  | --TSSKPLVWGARKVSSSS-----IATTGSQES----F-----VAR---PFKKGL---               | 637 |
|         | : . * * *   * : : . .       : . * * : *       :       *       : : :      |     |
| hsKIF5A | KRHLEESYDSLDELAKLQAQETVHEVALKDKEPDTQDADEVKALELQMES HREAHHRQ              | 713 |
| scSMY1  | -----NLHSIKVTSSTPKSPSSGS-----                                            | 656 |
|         | . : * : : . . . * : . : . .                                              |     |
| hsKIF5A | LARLRDEINEKQKTIDELKDLNQKLQLELEKLQADYEKCLKSEHEKSTKLQELTFLYERH             | 773 |
| scSMY1  | -----                                                                    | 656 |
| hsKIF5A | EQSKQDLKGLEETVARELQTLHNLKFLVQDVTRVKKSAEMEPEDSGGIHSQKQKISFL               | 833 |
| scSMY1  | -----                                                                    | 656 |

|         |                                                                                        |      |
|---------|----------------------------------------------------------------------------------------|------|
| hsKIF5A | ENNLEQLTKVHKQLVRDNADLRCELPKLEKRLRATAERVKALEGALKEAKEGAMKDKRRY                           | 893  |
| scSMY1  | -----                                                                                  | 656  |
| hsKIF5A | QQEVDRIKEAVRYKSSGKRAHSAQIAKPVRPGHYPASSPTNPYGTRSPECISYTNSLFQN                           | 953  |
| scSMY1  | -----                                                                                  | 656  |
| hsKIF5A | YQNLYLQATPSSTSDMYFAN <sup>S</sup> CTSSGATSSGGPLASYQKANMDNG <sup>N</sup> ATDINDNRSDLPCG | 1013 |
| scSMY1  | -----                                                                                  | 656  |
| hsKIF5A | YEAEDQAKLFPLHQETAAS                                                                    | 1032 |
| scSMY1  | -----                                                                                  | 656  |

**2-14:** CLUSTAL O(1.2.4) multiple sequence alignment **[ALS26]**

|        |                                                               |     |
|--------|---------------------------------------------------------------|-----|
| hsTIA1 | -----                                                         | 0   |
| scPUB1 | MSENNEEQHQQQQQQPVAVETPSAVEAPASADPSSEQSVAVEGNSEQAEDNQGENDP     | 60  |
| hsTIA1 | -----MEDEMPKTLVYVGNLSRDVTEALILQLFSQIGPCKNCKMIMDTA-GNDPYCFV    | 51  |
| scPUB1 | VPANAITGGRETSDRVLYVGNLDKAITEDILKQYFQVGPIANIKIMIDKNNKNVNYAFV   | 120 |
|        | .: :.*****.: **: :. * *. ** * *: :. * *.**                    |     |
| hsTIA1 | EFHEHRHAAAALAAMNGRKIMGKEVKVNWATTPSSQKKTSSSTVVSTQRSQDHFHVFVG   | 111 |
| scPUB1 | EYHQSHDANIALQTLNGKQIENNIVKINWAFQSQQ-----SSDDTFNLFVG           | 167 |
|        | *.*: :.* ** :*: :. :. **:*** .. . *.* *: :***                 |     |
| hsTIA1 | DLSP EITTEDIKAAFAPFGRISDARVVKDMATGKSKGYGFVSFFNKWDAENAIQQMGGQW | 171 |
| scPUB1 | DLNVNVDDETLRNAFKDFPSYLSGHVMWDMQTGSSRGYGFVSFTSQDDAQNAMDSMQGD   | 227 |
|        | **.: : * :. * * ..*: ** *.*:*****.: **:***:.* **              |     |
| hsTIA1 | LGGRQIRTNWATRKPPAPKSTYESNTK-----                              | 198 |
| scPUB1 | LNGRPLRINWAAKRDNNNNNNYQQRNRYGNNNRGGFRQYNSNNNNNMGMNMNMNMNMN    | 287 |
|        | *.* : * ***: : :..*.: :                                       |     |
| hsTIA1 | -----QLSYDEVVNQSSPSNCTVYCGG                                   | 220 |
| scPUB1 | NSRGMPPSSMGMPIGAMPLPSQGQPQQSQTIGLPPQVNPQAVDHIIRSAPPRVTAYIGN   | 347 |
|        | : *. : : : * *. * *                                           |     |
| hsTIA1 | VTSGLTEQLMRQTFSPFGQIMEIRVFPDKGYSFVRFNHESAAHAIVSVNGTTIEGHVVK   | 280 |
| scPUB1 | IPHFATEADLIPLFQNFQFILDFFKHYPEKGCCFIKYDTHEQAAVCIVALANFPFQGRNLR | 407 |
|        | : ** : *. ** *: : : :*:** .*: : : :*.** .*: : . :*: : :       |     |
| hsTIA1 | CYWGETLDMINPVQQNQIGYPQPYGQWGQWYGNAQQIGQYMPNGWQVPAYGMYGQAWN    | 340 |
| scPUB1 | TGWGKERSNFMPQQQQQGG--QPLIMNDQ-----QQPVMSEQQQQQQ               | 447 |
|        | **** : : : ***. * .: * *. . * :                               |     |
| hsTIA1 | QQGFNQTSAPWMGPNYGVQPPQGQNGSMLPNQPSGYRVAAGYETQ                 | 386 |
| scPUB1 | QQ--QQQQ-----                                                 | 453 |
|        | ** : * *                                                      |     |

**2-15:** CLUSTAL O(1.2.4) multiple sequence alignment **[ALS27]**

|          |                                                                             |     |
|----------|-----------------------------------------------------------------------------|-----|
| hsSPTLC1 | -----MATATEQWVLVEMVQA-----LYEAPAYHLILE                                      | 28  |
| scLCB1   | MAHIPEVLPKSIPIPAFIVTTSSYLWYYFNLVLTQIPGGQFIVSYIKKSHHDDPYRTTVE                | 60  |
|          | ::*: *   .:*: :                                                             |     |
| hsSPTLC1 | GILILWIIRLLEFSK---TYKLQERSDLTVKEKEELIEEWQPEPLVPPVPKDHPALNYNI                | 84  |
| scLCB1   | IGLILYGIIYYLSKPQQKSLQAQKPNLSPQEIDALIEDWEPEPLVDPSATDEQSWRV--                 | 118 |
|          | ***: *   .:**       .:*: *: : ***:*.***** *   .*. : .                       |     |
| hsSPTLC1 | VSGPPSHK-----T-----VVNGKECINFASFNFLGLLDNPRVKAAALASLKKYGVG                   | 131 |
| scLCB1   | AKTPVTMEMPIQNHITITRNNLQEKYTNVFNLASNNFLQLSATEPVKEVVKTTIKNYGVG                | 178 |
|          | .. * : :               *               : .: :*.** *** *   .   ** .. :*:**.* |     |
| hsSPTLC1 | TGPRGFYGTFDVHLDLEDRLAKFMKTEEAIISYGFATIASAIPAYSKRGDIVFVDRAA                  | 191 |
| scLCB1   | ACGPAGFYGNQDVHYTLEYDLAQFFGTQGSVLYGQDFCAAPSVLPFAFTKRGDVIVADDQV               | 238 |
|          | :*** ***. **   **   **.*: *: :*:*. .*:   *.:***:***:..* .                   |     |
| hsSPTLC1 | CFAIQKGLQASRSDIKLFKHNDMADLERLLKEQEIEDQKNPRKARVTRRFIVVEGLYMNT                | 251 |
| scLCB1   | SLPVQNALQLSRSTVYYFNHNDMNSLECLLNELTE-QEKLEKLPaiprkFIVTEGIFHNS                | 297 |
|          | .: :*:** *** :   *:***. ** **.*       :~* :   : *:***.**:~* :               |     |
| hsSPTLC1 | GTICPLPELVKLKYKYKARIFLEESLSFGVLGEHGRGVTEHYGINI-DDIDLISANMENA                | 310 |
| scLCB1   | GDLAPLPELTKLKNKYKFRLFVDETFSIGVLGATGRGLSEHFNMDRATAIDITVGSMTA                 | 357 |
|          | * .:*****.*** *** *:~*:~*:~*:~*   ***:~*:~*:~*   **~*   ..* .*              |     |
| hsSPTLC1 | LASIGGFCCGRSFVIDHQRLSGQGYCFSASLPPLAAAAIEALNIMEENPGIFAVLKEKC                 | 370 |
| scLCB1   | LGSTGGFVLGDSVMCLHQRIQSNAYCFSACLPAITVTSVSKVLKLMSNNDVQTLQKLS                  | 417 |
|          | *.* *** * *.~*   ***:~*:~*:~*   ... :~*:~*:~*   ..*~* .                     |     |
| hsSPTLC1 | GQIHKALQGISGLK---VVGESLSPAFHLQLEESTGSREQ-----                               | 407 |
| scLCB1   | KSLHDSFASDDSLRSYVIVTSSPVSAVLHLQLTPAYRSRKFGYTCEQLFETMSALQKKSQ                | 477 |
|          | .:~*:~* . .~*:       *... :~* .:***~* :   **~*                              |     |
| hsSPTLC1 | -----DVRLLQEIVDQCMNR-SIALTQARYLEKEEKCLPPPSIRVVVTVEQTEEE                     | 456 |
| scLCB1   | TNKFIEPYEEEEKFLQSIVDHALINYNVLITRNTIVLKQETLPIVPSLKICNAAMSPEE                 | 537 |
|          | : :~*:~*.***:~* . .:~*:       :~*:~*       ***:~*   .. :~*~*                |     |
| hsSPTLC1 | LERAASTIKEVAQAVLL----                                                       | 473 |
| scLCB1   | LKNACESVKQSILACCQESNK                                                       | 558 |
|          | *:~*..:~*:~*       *                                                        |     |

**2-16:** CLUSTAL O(1.2.4) multiple sequence alignment **[FTD-ALS2]**

```
hsCHCHD10      MP--RGSRSAA--SRPASRPAAP----SAHPPAHPPPSAA---APAPAPSGQPGLMAQMA 49
scMIX17        MARSRGSSRPISRSRPTQTRSASTMAAPVHPQQQQPNAYSHPPAAGAQTROPGMFAQMA 60
               *   ***           ***:.   :*           .**   :   *. *           * *   :   ***.:****

hsCHCHD10      TTAAGVAVGSAVGHVMGSSALTGAFSGGSSEPSQPAVQQAPTPA-----APQPLQMGPCAY 104
scMIX17        STAAGVAVGSTIGHTLGAGITGMFSGSGSDSAPVEQQQQNMANTSGQTQTDQQLGRTCEI 120
               :*****GS:**.:GS:.:** ***..*: :   **           :           *

hsCHCHD10      EIRQFLDCSTT-QSDLSLCEGFSEALKQCKYYHGLSSLP           142
scMIX17        DARNFTRCLDENNGNFQICDYQLQQLKACQEAAARQY---           156
               :  *: *   *   :.:.:.*: : :  ** *:
```



**2-17: CLUSTAL O(1.2.4) multiple sequence alignment [FTD-ALS5]**

|        |                                                               |     |
|--------|---------------------------------------------------------------|-----|
| hsCCNF | -----MGSGGVVHCRCAKCFCYPTKRRIRRRPRNLTILSLPEDVLFHILKWLSVEDILAV  | 55  |
| scCLN1 | MNHSEVKTGLIVT---AKQTYYPIELS-----NAELLTHY---E-----TI           | 35  |
|        | : :* :* ** ** : : * *                                         |     |
| hsCCNF | RAVHSQLKDLVDNHASVWACASFQELWPSPGNLKLFERAAEKGNFEEAVKLGIAIYLYNEG | 115 |
| scCLN1 | QEYHEEISQ-----NVLVQS-SKTKPDIKLIDQQPEMNPQH-TREAIVTFYQLS        | 83  |
|        | : * . . . . : . * . : : * * : : * . : : : : : * * : .         |     |
| hsCCNF | LSVSDEARAEVNG--LKASRFF-----SLAERLNVGAAPFIWLFIRPPWSVSGSCK      | 165 |
| scCLN1 | VMTRV-----SNGIFFHAVRFYDRYCSKRVLKQAKLVVGTCLWLAA-KTW---GGCNH    | 134 |
|        | : . ** : * * : * : : . . : * * * * *                          |     |
| hsCCNF | AVVHESLRAECQLQRTHKASILHCLGRVLSLFEDEEKQQQAHDLFEEAAHQGC--LTSSY  | 223 |
| scCLN1 | IINNVS IPTGGRFYGPNPRARIPRLSELVH-----YCGGSDLFDESMFIQMERHILDT   | 187 |
|        | : : * : : : : : * . . . . . * * * * * . .                     |     |
| hsCCNF | LLWESDRR---TDVSDPGRCLHSFRKLRDY-----AAKGCWEAQLSLAKACANANQLGL   | 274 |
| scCLN1 | LNWDVYEPMINDYILNVDENCLIQELYKNQLQNNNSNGKEWSCK-----RKSQSSD      | 239 |
|        | * * : . : . * * . . : : : * . . : . * *                       |     |
| hsCCNF | EVRASSE-IVCQLFQASQAVSKQQVFSVQKGLNDTMYIILIDWLVEVATMKDFTSLCLHL  | 333 |
| scCLN1 | DSDATVEEHISSPQSTGLDGDTTTMDDEDEELNSKIKLINL-----                | 280 |
|        | : * : * . . * : . . . . : : * * . . : * :                     |     |
| hsCCNF | TVECVDRLRRRLVPRYRLQLLGIACMVICTRFISKE--ILTIREAVWLTD--NTYKYE    | 388 |
| scCLN1 | -----KRFLIDL--SCWQYNLLKFELYEICNGMFSIINKFTNQDQGPFLSMPIGNDINSN  | 333 |
|        | . * * : : * * : * * . : * : . . : * : *                       |     |
| hsCCNF | DLVFMGEIVSALEGKIRV-PTVVDYKEVLLTLVPVELRTQHLC-----SFLCELSLL     | 440 |
| scCLN1 | TQTQVFSII---INGIVNSPPSLVEVYKEQYGIVPFILQVKDYNLELQKKLQLASTIDLT  | 390 |
|        | . : . . * : * : . * * * : : * * . * . . . : . . : *           |     |
| hsCCNF | -----HTSLSAYAPARLAAA---ALLLARLTHGQTQPWTTQ                     | 473 |
| scCLN1 | RKIAVNSRYFDQNASSSSVSSPSTYSSGTNYTPMRNFSAQSDNSVFSTTNIDHSSPITPH  | 450 |
|        | : * : * * * * : : : . . . . * * :                             |     |
| hsCCNF | LWDLTGFSYEDLIPCVLSLH---KKCFHDDAP--KDYRQVSLTAVKQRFEDKRYGEISQE  | 528 |
| scCLN1 | MYTFNQFKNESACDSAISVSSLPNQQTQNGNMPLSSNYQNMME---ERNKENRIPN---   | 503 |
|        | : : . . * . * . . : * : : : * . : * : : * : *                 |     |
| hsCCNF | EVLSYSQALCAALGVTQDSPDPPTFLSTGEIHAFLSSPSGRRTKRKRENSLQEDRGSFVTT | 588 |
| scCLN1 | -----SSSAEIPQRAKEMTTGIFQ-----                                 | 522 |
|        | . : : * : . * : * * : :                                       |     |
| hsCCNF | PTAELSSQEETLLGSFLDWSLDCCSGYEGDQSEGEKEGDVTAPSGILDVTVVYLNPEQH   | 648 |
| scCLN1 | -----                                                         | 522 |
| hsCCNF | CCQEESDEEACPEDKGPQDPQALALDTQIPATPGPKPLVRTSREPDKDVTTSYSSVSTA   | 708 |
| scCLN1 | -----                                                         | 522 |
| hsCCNF | SPTSSVDGGLGALPQPTSVLSLSDSHTQPCHHQARKSCLQCRPPSPPESSVPQQQVKRI   | 768 |
| scCLN1 | -----NTGELTNRASSISLSLRNHNSSQL-----                            | 546 |
|        | . * * : : * * * . * . .                                       |     |
| hsCCNF | NLCIHSEEDMNLGLVRL                                             | 786 |
| scCLN1 | -----                                                         | 546 |

**2-17 (continued):** CLUSTAL O(1.2.4) multiple sequence alignment **[FTD-ALS5]**

|        |                                                               |     |
|--------|---------------------------------------------------------------|-----|
| hsCCNF | MGSGGVVHCRCAKCFCYPTKRRIRRRPRNLTL-SLPEDVLFHILKWLSVEDILAVRAVH   | 59  |
| scCLN2 | -----MASAEPRPRMGLVINAKPDYYPIE-----                            | 24  |
|        | . *** : : * : : .                                             |     |
| hsCCNF | SQLKDLVDNHASVWACASFQELWSPGNLKLFERAAEKGNFEEAVKLGIAIYLYNEGLSVS  | 119 |
| scCLN2 | -----                                                         | 24  |
| hsCCNF | DEARAEVNLKASRFFSLAERLNVGAAPFIWLFIRPPWSVSGSCCKAVVHESLRAECQLQ   | 179 |
| scCLN2 | -----                                                         | 24  |
| hsCCNF | RTHKASILHCLGRVLSLFEEDEEKQQQAHDLFEEAAHQGCLTSSYLLWESDRRTDVSDPGR | 239 |
| scCLN2 | -----LSNAE                                                    | 29  |
|        | . . .                                                         |     |
| hsCCNF | CLHSFRKLRDYAAKGCWEAQSLAKACANANQLGLEVRASSEIVCQLFQASQAVSKQQVF   | 299 |
| scCLN2 | LLSHFEMLQEYHQEIST--NVIAQ-----SCKFKPNPKLIDQ----                | 64  |
|        | * * . * : * : . : * : * : : :                                 |     |
| hsCCNF | SVQKGLN-DTMRYLIDWLVEVATMKDFTSLCLHLTVECVDRLRRRLVPRYRLQLLGIA    | 358 |
| scCLN2 | --QPEMNPVETRNSNIITFLFELSVVTRVTNGIFFHSVRLYDRYCSKRIVLRDQAKLVVAT | 122 |
|        | * : * * : * : * . : . : * . * : * * : : * : :                 |     |
| hsCCNF | CMVICTRFISKEILTIREAVWLTNTYKYEDLVMMGEIVSALEGKIRVPTVVDYKEVLL    | 418 |
| scCLN2 | C-----LWLAAKTWGGCN--HIINNVVIPTGGRFYGPNPARR-----               | 157 |
|        | * : * : * : : : * : * : *                                     |     |
| hsCCNF | TLVPVELRTQHLCNFLCELSLLHTSLSAYAPARLAAAALLLARLTHGQTQPWTTQLWDLT  | 478 |
| scCLN2 | --IPRLSELVHYCGD--GQVFDE-----SMFLQ-M--ERHILDTLNWNIIY           | 195 |
|        | : * . * * . : . : : * : : : * * : :                           |     |
| hsCCNF | GFSYEDLIPCVLSLHKKCFHDDAP-----KDYRQVSLTAV-KQRFEDKRYGEIS        | 526 |
| scCLN2 | EPMIND--YVLNVDENCLMQYELYENQVTYDKQCSEKRQSLSQSDATVDERPYQNEE     | 252 |
|        | : * * . : : * : : : : * : * . * : . : : * : :                 |     |
| hsCCNF | -----QEEVLSYSQLCAALGVTQDSPDPPTFLSTGEIHAF                      | 561 |
| scCLN2 | EEEEDLKLKIKLINLKKFLIDVSAWQYDLLRYELFEVSHGIF-----S-             | 295 |
|        | * : * * . : : * : :                                           |     |
| hsCCNF | LSSPSGRRTKRKRENSLQEDRGSFVTTPTAELSSQEETLLGSFLDWSLDCCSGYEGDQES  | 621 |
| scCLN2 | -----IINQFTNQDHGPFLLTTPMTSESKNGEIL-STLM-----                  | 327 |
|        | : : : * * * : * : . * : * * . : :                             |     |
| hsCCNF | EGEKEGDVTAPSGILDVT-----VVYLNPEQH                              | 648 |
| scCLN2 | ---NGIVSIPNSLMEVYKTVNGVLPFINQVKEYHLDLQRKLQIASNLNISRKLTISTPS   | 383 |
|        | : * * : * . : : *                                             |     |
| hsCCNF | CCQESSDEEACPEDK-----GPQDPQALALDTQIP--                         | 678 |
| scCLN2 | CSFENSNSTSIPSPASSQSHTPMRNMSSLSDNSVFSRNMEQSSPITPSMYQFGQQQSNS   | 443 |
|        | * . * . * . : * . : * * . : . *                               |     |
| hsCCNF | -----ATPGPKPLVRTSREPGKDVTTSGYSSV-----STA                      | 708 |
| scCLN2 | ICGSTSVSVNSLVNTNNKQRIYEQITGPNSSNATNDYIDLNLNESNKENQNPATAHYLNG  | 503 |
|        | * . : : . * . : * . * . : .                                   |     |
| hsCCNF | SPTSSVDGGLGALPQPTSVLSLSDSDSHTQPCHHQARKSCLQCRPPSPPESSVPQQQVKRI | 768 |
| scCLN2 | GPPKTSFINHGMFSPPTGTINSGKSSSASSL-----I                         | 535 |
|        | . * . : . * : * . * . : . . * : . *                           |     |

|        |                    |     |
|--------|--------------------|-----|
| hsCCNF | NLCIHSEEDMNLGLVRL- | 786 |
| scCLN2 | -----SFGMGNTQVI    | 545 |
|        | .:.:* .:.          |     |

**2-17 (continued):** CLUSTAL O(1.2.4) multiple sequence alignment **[FTD-ALS5]**

|        |                                                                                                                                                                    |     |
|--------|--------------------------------------------------------------------------------------------------------------------------------------------------------------------|-----|
| hsCCNF | MGSGGVVHCRCAKCFCYPTKRRIRRRPRNLTILSLPEDVLFHILKWLSVEDILAVRAVHS                                                                                                       | 60  |
| scCLN3 | -----                                                                                                                                                              | 0   |
| hsCCNF | QLKDLVDNHASVWACASFQELWPSPGNLKLFERAAEKGNFEEAAVKLGIAYLYNEGLSVSD                                                                                                      | 120 |
| scCLN3 | -----                                                                                                                                                              | 0   |
| hsCCNF | EARAEVNLKASRFFSLAERLNVGAAPFIWLFIRPPWSVSGSCCKAVVHESLRAECQLQR                                                                                                        | 180 |
| scCLN3 | -----                                                                                                                                                              | 0   |
| hsCCNF | THKASILHCLGRVLSLFEDEEKQQQAHLFEEAAHQGCLTSSYLLWESDRRTDVSDPGRC                                                                                                        | 240 |
| scCLN3 | -----MAILK-----DTIIRYANARYATASGTST-<br>:::                                          .: : . * : . * .                                                               | 24  |
| hsCCNF | LHSFRKLRDYAAKGCWEAQLSLAKAC-----ANANQLGLEVRASS-----EI                                                                                                               | 282 |
| scCLN3 | ----ATAASVSAASCPNLPPLLQKRRAIASAKSKNPNLVKRELQAHHSAISEYNNDQLDH<br>. . : * . * : * * *                               * * : * : *                               :      | 80  |
| hsCCNF | VCQLFQASQAVSKQQVFSVQKGLNDTMRYYILIDWLVEVATMKDFTSLCLHLTVECVDRYL                                                                                                      | 342 |
| scCLN3 | YFRLSHTERPLYNLTNFNSQPQVNPKMRFILFDFIMYCHTRLNLSTSTLFLTFTILDKYS<br>:* : : : : :   * . * : * . * : : : : :   * : : :   * . * . : : *                                   | 140 |
| hsCCNF | RRRLVPRYRLQLLGIACMVICTRFISKEIL--TIREAVWLTDNTYKYEDLV <del>R</del> MMGEIVSA                                                                                          | 400 |
| scCLN3 | SRFIKSYNYQLLSLTALWISSKFWDKSNRMATLKVQLNCCNQYSIKQFTTMMHFLFKS<br>* : :   * . * . * : : :   * : : *   * : :   * * * . : : . *   . . . :                                | 200 |
| hsCCNF | LEGKIRVP-TVVDYKEVLLTL-----VPVELRTQ-----                                                                                                                            | 428 |
| scCLN3 | LDWSICQSATFDSYIDIFLFQSTSPSPGVLSAPLEAFIQQLALLNNAAGTAINKSSS<br>* : . *       * . . * : : *                               * : *       *                               | 260 |
| hsCCNF | -----HLCSFLCELSLLHTSLSA-YAPARLAAAALLARLTHGQTQPWTTQLW                                                                                                               | 475 |
| scCLN3 | SQGPSLNINEIKLGAIMLCELASFNLELSFKYDRSLIALGAINLI--KLSLNYYNSNLW<br>. : * * * : : . * *   * : : * . * :   . . : : : * *                                                 | 317 |
| hsCCNF | DLTGFSYEDLIPCVLSLHKKCFHDDAPKDYRQVSLTAVKQRFEDKRYGEISQEEVLSYSQ                                                                                                       | 535 |
| scCLN3 | ENINLAL EE-----NCQDL DIK-----LSEISNT-----<br>: . : : * :                               * . *                               . * * :                                 | 341 |
| hsCCNF | LCAALGVTQDSPD-PPTFLSTGEIHAFLSSPSGRRTKR----KRENSLQEDRGSFVTTPT                                                                                                       | 590 |
| scCLN3 | ---LLDIAMDQNSFPSSFKS-----KYLNSNKTSLAKSLDALQNYCIQLKLEEFYRS--<br>* : : * . . * : * *                               : * . .   * : : : * . . * :   :                   | 391 |
| hsCCNF | AELSSQEETL-LGSFLDWSLDCCSGYEGDQES <del>E</del> GE <del>R</del> KEGDVTAPSGILDVTVVYLNPEQHC                                                                            | 649 |
| scCLN3 | QELETMYNTIFAQSFDSDSLTCVYSNATTPKS-----A-----TVSSAATDYFSDHHTL<br>** : : : :   * * . * *   . :                               . : . . . * : . . *                      | 440 |
| hsCCNF | CQESSDEEACPEDKGPQDPQALALDTQIPATPGPKPLVRTSRE-----PGK---DVTTS                                                                                                        | 700 |
| scCLN3 | RRLTKDISPPFAFTP-----T--SSSSSPSPFNSPYKTSSSMTTPDSASHHSHSG<br>: . : * : *                               * : : . * : :   :                               * . . . : . : | 489 |
| hsCCNF | GYSSVSTASPTSSVDGGLGALPQPTSVLSLSDSDSHTPCHHQAR-----KSCLQC                                                                                                            | 750 |
| scCLN3 | SFSST----QNSFKRSL-SIPQNSSIFWPSPLTPTPSLMSNRKLLQNLVRSKRLFPV<br>.: * .       . * . . * : : * : :   . :   * * . .   * :                               :                | 543 |
| hsCCNF | RPPSPPE-SSVPQQQVKRINLCIHSE-EEDMNLGLVRL                                                                                                                             | 786 |
| scCLN3 | RPMTAHPCSAPTQLKKRSTSSVDCDFNDSSNLKKTR-<br>* * : . . * . *   * * . : : : : :   : :   * *   . *                                                                       | 580 |
